# Supplementary material for: Apostasia Mitochondrial Genome Analysis and Monocot Mitochondria Phylogenomics
Source: MDPI journal article supplement (doi:10.3390/ijms24097837), 2023-04-25
Supplement: s1 [file s1]

# ***Apostasia* mitochondrial genome analysis and monocot mitochondria phylogenomics**

Shijie Ke<sup>1</sup>, Ding-Kun Liu<sup>1</sup>, Xiong-De Tu<sup>1</sup>, Xin He<sup>1</sup>, Meng-Meng Zhang<sup>1</sup>, Meng-Jia Zhu<sup>1</sup>, Diyang Zhang<sup>2</sup>, Cuili Zhang<sup>2</sup>, Siren Lan<sup>1,2\*</sup> and Zhong-Jian Liu<sup>2\*</sup>

<sup>1</sup>Fujian Colleges and Universities Engineering Research Institute of Conservation and Utilization of Natural Bioresources, College of Forestry, Fujian Agriculture and Forestry University, Fuzhou, 350002, China

<sup>2</sup>Key Laboratory of Orchid Conservation and Utilization of National Forestry and Grassland Administration at College of Landscape Architecture and Art, Fujian Agriculture and Forestry University, Fuzhou, 350002, China

3210422027@fafu.edu.cn (S.K.); fjliudk@163.com (D.-K.L.); tttxd163@163.com (X.-D.T); 5220422102@fafu.edu.cn (X.H.); 1220428020@fafu.edu.cn (M.-M.Z.); 1200455008@fafu.edu.cn (M.-J.Z.); diyangzhang@126.com (D.Z.); cuilizhang@fafu.edu.cn (C.Z.).

\*Correspondence: zjliu@fafu.edu.cn; lkzx@fafu.edu.cn;

## Supplementary Tables

Table S1 Gene content of *A.shenzhenica* mitogenome.

| Group of Genes                                 | Gene Name                                                                                                                                                             |
|------------------------------------------------|-----------------------------------------------------------------------------------------------------------------------------------------------------------------------|
| Complex I (NADH dehydrogenase)                 | <i>nad1, nad3, nad4L(2), nad5*, nad6, nad7****, nad9</i>                                                                                                              |
| Complex III (ubiquinol cytochrome c reductase) | <i>cob</i>                                                                                                                                                            |
| Complex IV (cytochrome c oxidase)              | <i>cox1, cox3</i>                                                                                                                                                     |
| Complex V (ATP synthase)                       | <i>atp1, atp4, atp6, atp8, atp9</i>                                                                                                                                   |
| Cytochrome c biogenesis                        | <i>ccmB, ccmC, ccmFc*, ccmFn</i>                                                                                                                                      |
| Ribosomal proteins (SSU)                       | <i>rps1, rps3*, rps4, rps7, rps10*, rps11, rps12, rps13, rps14, rps19</i>                                                                                             |
| Ribosomal proteins (LSU)                       | <i>rpl2*, rpl5, rpl16</i>                                                                                                                                             |
| Maturases                                      | <i>matR</i>                                                                                                                                                           |
| Transport membrane protein                     | <i>mttB</i>                                                                                                                                                           |
| Ribosomal RNAs                                 | <i>rrn5, rrn18</i>                                                                                                                                                    |
| Transfer RNAs                                  | <i>trnD-GUC, trnA-Met, trnQ-UUG, trnM-CAU, trnK-UUU, trnQ-UUG, trnP-UGG, trnW-CCA, trnA-Cys, trnF-GAA, trnA-Phe, trnA-Lys, trnA-Gln, trnA-Thr, trnY-GUA, trnC-GCA</i> |
| Cp transfer proteins                           | <i>psaJ</i>                                                                                                                                                           |

\*: represents intron number; Gene(2): Number of copies of multi-copy genes.

Table S2. Ka/Ks analysis of *A.shenzhenica* and four different Asparagales genes;

| Seq1                         | Seq2                         | Gene         | Ks     | Ka     | Ka/Ks       |
|------------------------------|------------------------------|--------------|--------|--------|-------------|
| <i>Apostasia shenzhenica</i> | <i>Allium cepa</i>           | <i>atp1</i>  | 0.1098 | 0.0232 | 0.2113      |
| <i>Apostasia shenzhenica</i> | <i>Gastrodia elata</i>       | <i>atp1</i>  | 0.0497 | 0.0187 | 0.376257545 |
| <i>Apostasia shenzhenica</i> | <i>Hemerocallis citrina</i>  | <i>atp1</i>  | 0.0762 | 0.0088 | 0.115485564 |
| <i>Apostasia shenzhenica</i> | <i>Asparagus officinalis</i> | <i>atp1</i>  | 0.0646 | 0.0241 | 0.373065015 |
| <i>Apostasia shenzhenica</i> | <i>Allium cepa</i>           | <i>atp4</i>  | 0.0415 | 0.0519 | 1.25060241  |
| <i>Apostasia shenzhenica</i> | <i>Gastrodia elata</i>       | <i>atp4</i>  | 0.1157 | 0.0592 | 0.511668107 |
| <i>Apostasia shenzhenica</i> | <i>Hemerocallis citrina</i>  | <i>atp4</i>  | 0.0232 | 0.0264 | 1.137931034 |
| <i>Apostasia shenzhenica</i> | <i>Asparagus officinalis</i> | <i>atp4</i>  | 0.0351 | 0.023  | 0.655270655 |
| <i>Apostasia shenzhenica</i> | <i>Allium cepa</i>           | <i>atp6</i>  | 0.0808 | 0.0415 | 0.513613861 |
| <i>Apostasia shenzhenica</i> | <i>Gastrodia elata</i>       | <i>atp6</i>  | 0.1093 | 0.0483 | 0.441903019 |
| <i>Apostasia shenzhenica</i> | <i>Hemerocallis citrina</i>  | <i>atp6</i>  | 0.0613 | 0.0279 | 0.455138662 |
| <i>Apostasia shenzhenica</i> | <i>Asparagus officinalis</i> | <i>atp6</i>  | 0.0613 | 0.0356 | 0.580750408 |
| <i>Apostasia shenzhenica</i> | <i>Allium cepa</i>           | <i>atp8</i>  | 0.5999 | 0.2566 | 0.427737956 |
| <i>Apostasia shenzhenica</i> | <i>Gastrodia elata</i>       | <i>atp8</i>  | 0.1729 | 0.1048 | 0.606130711 |
| <i>Apostasia shenzhenica</i> | <i>Hemerocallis citrina</i>  | <i>atp8</i>  | 0.2326 | 0.1286 | 0.552880482 |
| <i>Apostasia shenzhenica</i> | <i>Asparagus officinalis</i> | <i>atp8</i>  | 0.314  | 0.1342 | 0.427388535 |
| <i>Apostasia shenzhenica</i> | <i>Allium cepa</i>           | <i>atp9</i>  | 0.0634 | 0.1055 | 1.664037855 |
| <i>Apostasia shenzhenica</i> | <i>Gastrodia elata</i>       | <i>atp9</i>  | 0.1105 | 0.0726 | 0.657013575 |
| <i>Apostasia shenzhenica</i> | <i>Hemerocallis citrina</i>  | <i>atp9</i>  | 0.0866 | 0.1053 | 1.215935335 |
| <i>Apostasia shenzhenica</i> | <i>Asparagus officinalis</i> | <i>atp9</i>  | 0.086  | 0.0858 | 0.997674419 |
| <i>Apostasia shenzhenica</i> | <i>Allium cepa</i>           | <i>ccmb</i>  | 0.1074 | 0.0408 | 0.379888268 |
| <i>Apostasia shenzhenica</i> | <i>Gastrodia elata</i>       | <i>ccmb</i>  | 0.0754 | 0.0578 | 0.766578249 |
| <i>Apostasia shenzhenica</i> | <i>Hemerocallis citrina</i>  | <i>ccmb</i>  | 0.0646 | 0.0362 | 0.560371517 |
| <i>Apostasia shenzhenica</i> | <i>Asparagus officinalis</i> | <i>ccmb</i>  | 0.0504 | 0.0362 | 0.718253968 |
| <i>Apostasia shenzhenica</i> | <i>Allium cepa</i>           | <i>ccmc</i>  | 0.0768 | 0.0447 | 0.58203125  |
| <i>Apostasia shenzhenica</i> | <i>Gastrodia elata</i>       | <i>ccmc</i>  | 0.0892 | 0.0368 | 0.412556054 |
| <i>Apostasia shenzhenica</i> | <i>Hemerocallis citrina</i>  | <i>ccmc</i>  | 0.0641 | 0.023  | 0.358814353 |
| <i>Apostasia shenzhenica</i> | <i>Asparagus officinalis</i> | <i>ccmc</i>  | 0.0704 | 0.0269 | 0.382102273 |
| <i>Apostasia shenzhenica</i> | <i>Allium cepa</i>           | <i>ccmfc</i> | 0.1076 | 0.0496 | 0.460966543 |
| <i>Apostasia shenzhenica</i> | <i>Gastrodia elata</i>       | <i>ccmfc</i> | 0.0813 | 0.0827 | 1.017220172 |
| <i>Apostasia shenzhenica</i> | <i>Hemerocallis citrina</i>  | <i>ccmfc</i> | 0.0641 | 0.0502 | 0.783151326 |
| <i>Apostasia shenzhenica</i> | <i>Asparagus officinalis</i> | <i>ccmfc</i> | 0.0731 | 0.0475 | 0.649794802 |

|                              |                              |              |        |        |             |
|------------------------------|------------------------------|--------------|--------|--------|-------------|
| <i>Apostasia shenzhenica</i> | <i>Allium cepa</i>           | <i>cob</i>   | 0.051  | 0.0277 | 0.543137255 |
| <i>Apostasia shenzhenica</i> | <i>Gastrodia elata</i>       | <i>cob</i>   | 0.0506 | 0.023  | 0.454545455 |
| <i>Apostasia shenzhenica</i> | <i>Hemerocallis citrina</i>  | <i>cob</i>   | 0.0512 | 0.0172 | 0.3359375   |
| <i>Apostasia shenzhenica</i> | <i>Asparagus officinalis</i> | <i>cob</i>   | 0.0511 | 0.0195 | 0.381604697 |
| <i>Apostasia shenzhenica</i> | <i>Allium cepa</i>           | <i>cox1</i>  | 0.1136 | 0.0326 | 0.286971831 |
| <i>Apostasia shenzhenica</i> | <i>Gastrodia elata</i>       | <i>cox1</i>  | 0.0605 | 0.0189 | 0.312396694 |
| <i>Apostasia shenzhenica</i> | <i>Hemerocallis citrina</i>  | <i>cox1</i>  | 0.0596 | 0.0089 | 0.149328859 |
| <i>Apostasia shenzhenica</i> | <i>Asparagus officinalis</i> | <i>cox1</i>  | 0.0631 | 0.026  | 0.412044374 |
| <i>Apostasia shenzhenica</i> | <i>Allium cepa</i>           | <i>cox3</i>  | 0.1029 | 0.0205 | 0.199222546 |
| <i>Apostasia shenzhenica</i> | <i>Gastrodia elata</i>       | <i>cox3</i>  | 0.0632 | 0.0309 | 0.488924051 |
| <i>Apostasia shenzhenica</i> | <i>Hemerocallis citrina</i>  | <i>cox3</i>  | 0.0589 | 0.0184 | 0.312393888 |
| <i>Apostasia shenzhenica</i> | <i>Asparagus officinalis</i> | <i>cox3</i>  | 0.0753 | 0.015  | 0.199203187 |
| <i>Apostasia shenzhenica</i> | <i>Allium cepa</i>           | <i>mttb</i>  | 0.0373 | 0.0292 | 0.782841823 |
| <i>Apostasia shenzhenica</i> | <i>Gastrodia elata</i>       | <i>mttb</i>  | 0.0709 | 0.0354 | 0.499294781 |
| <i>Apostasia shenzhenica</i> | <i>Hemerocallis citrina</i>  | <i>mttb</i>  | 0.0278 | 0.0197 | 0.708633094 |
| <i>Apostasia shenzhenica</i> | <i>Asparagus officinalis</i> | <i>mttb</i>  | 0.0342 | 0.0197 | 0.576023392 |
| <i>Apostasia shenzhenica</i> | <i>Allium cepa</i>           | <i>nad3</i>  | 0.0594 | 0.0505 | 0.85016835  |
| <i>Apostasia shenzhenica</i> | <i>Gastrodia elata</i>       | <i>nad3</i>  | 0.0844 | 0.0425 | 0.503554502 |
| <i>Apostasia shenzhenica</i> | <i>Hemerocallis citrina</i>  | <i>nad3</i>  | 0.0597 | 0.0544 | 0.911222781 |
| <i>Apostasia shenzhenica</i> | <i>Asparagus officinalis</i> | <i>nad3</i>  | 0.0471 | 0.0465 | 0.987261146 |
| <i>Apostasia shenzhenica</i> | <i>Allium cepa</i>           | <i>nad4L</i> | 0.165  | 0.0206 | 0.12484848  |
| <i>Apostasia shenzhenica</i> | <i>Gastrodia elata</i>       | <i>nad4L</i> | 0.1366 | 0.0723 | 0.292825768 |
| <i>Apostasia shenzhenica</i> | <i>Hemerocallis citrina</i>  | <i>nad4L</i> | 0.165  | 0.0206 | 0.12484848  |
| <i>Apostasia shenzhenica</i> | <i>Asparagus officinalis</i> | <i>nad4L</i> | 0.165  | 0.0206 | 0.12484848  |
| <i>Apostasia shenzhenica</i> | <i>Allium cepa</i>           | <i>nad6</i>  | 0.0708 | 0.0587 | 0.829096045 |
| <i>Apostasia shenzhenica</i> | <i>Gastrodia elata</i>       | <i>nad6</i>  | 0.0531 | 0.0599 | 1.128060264 |
| <i>Apostasia shenzhenica</i> | <i>Hemerocallis citrina</i>  | <i>nad6</i>  | 0.1069 | 0.0564 | 0.527595884 |
| <i>Apostasia shenzhenica</i> | <i>Asparagus officinalis</i> | <i>nad6</i>  | 0.0852 | 0.0564 | 0.661971831 |
| <i>Apostasia shenzhenica</i> | <i>Allium cepa</i>           | <i>nad7</i>  | 0.0264 | 0.0107 | 0.40530303  |
| <i>Apostasia shenzhenica</i> | <i>Gastrodia elata</i>       | <i>nad7</i>  | 0.0389 | 0.0113 | 0.290488432 |
| <i>Apostasia shenzhenica</i> | <i>Hemerocallis citrina</i>  | <i>nad7</i>  | 0.0157 | 0.0096 | 0.611464968 |
| <i>Apostasia shenzhenica</i> | <i>Asparagus officinalis</i> | <i>nad7</i>  | 0.0192 | 0.0084 | 0.4375      |
| <i>Apostasia shenzhenica</i> | <i>Allium cepa</i>           | <i>nad9</i>  | 0.075  | 0.0285 | 0.38        |
| <i>Apostasia shenzhenica</i> | <i>Gastrodia elata</i>       | <i>nad9</i>  | 0.0611 | 0.0299 | 0.489361702 |
| <i>Apostasia shenzhenica</i> | <i>Hemerocallis citrina</i>  | <i>nad9</i>  | 0.0704 | 0.0161 | 0.228693182 |

|                              |                              |              |        |        |             |
|------------------------------|------------------------------|--------------|--------|--------|-------------|
| <i>Apostasia shenzhenica</i> | <i>Asparagus officinalis</i> | <i>nad9</i>  | 0.0706 | 0.0188 | 0.266288952 |
| <i>Apostasia shenzhenica</i> | <i>Allium cepa</i>           | <i>rps7</i>  | 1.1904 | 0.6126 | 0.514616935 |
| <i>Apostasia shenzhenica</i> | <i>Gastrodia elata</i>       | <i>rps7</i>  | 0.0287 | 0.0659 | 2.296167247 |
| <i>Apostasia shenzhenica</i> | <i>Hemerocallis citrina</i>  | <i>rps7</i>  | 0.032  | 0.0652 | 2.0375      |
| <i>Apostasia shenzhenica</i> | <i>Asparagus officinalis</i> | <i>rps7</i>  | 0.032  | 0.0652 | 2.0375      |
| <i>Apostasia shenzhenica</i> | <i>Allium cepa</i>           | <i>rps12</i> | 0.1699 | 0.0432 | 0.254267216 |
| <i>Apostasia shenzhenica</i> | <i>Gastrodia elata</i>       | <i>rps12</i> | 0.0685 | 0.0321 | 0.468613139 |
| <i>Apostasia shenzhenica</i> | <i>Hemerocallis citrina</i>  | <i>rps12</i> | 0.1685 | 0.04   | 0.237388724 |
| <i>Apostasia shenzhenica</i> | <i>Asparagus officinalis</i> | <i>rps12</i> | 0.1618 | 0.0804 | 0.496909765 |

---

Table S3. Prediction of RNA editing sites in *A.shenzhenica* mitogenome

| Type                    | RNA -editing       | Number | Percentage |
|-------------------------|--------------------|--------|------------|
| hydrophobic             | CTT (L) => TTT (F) | 8      | 28.85%     |
|                         | CCG (P) => CTG (L) | 17     |            |
|                         | CCA (P) => CTA (L) | 32     |            |
|                         | CCC (P) => TTC (F) | 2      |            |
|                         | CCT (P) => CTT (L) | 25     |            |
|                         | GCG (A) => GTG (V) | 2      |            |
|                         | CCC (P) => CTC (L) | 11     |            |
|                         | CTC (L) => TTC (F) | 7      |            |
|                         | CCT (P) => TTT (F) | 12     |            |
|                         | GCT (A) => GTT (V) | 3      |            |
|                         | GCC (A) => GTC (V) | 1      |            |
| hydrophilic             | CGT (R) => TGT (C) | 28     | 14.42%     |
|                         | CGC (R) => TGC (C) | 9      |            |
|                         | CAT (H) => TAT (Y) | 15     |            |
|                         | CAC (H) => TAC (Y) | 8      |            |
| hydrophobic-hydrophilic | CCC (P) => TCC (S) | 13     | 10.82%     |
|                         | CCA (P) => TCA (S) | 8      |            |
|                         | CCT (P) => TCT (S) | 16     |            |
|                         | CCG (P) => TCG (S) | 8      |            |
| hydrophilic-hydrophobic | TCG (S) => TTG (L) | 34     | 45.43%     |
|                         | TCA (S) => TTA (L) | 52     |            |
|                         | TCT (S) => TTT (F) | 38     |            |
|                         | ACT (T) => ATT (I) | 3      |            |
|                         | TCC (S) => TTC (F) | 29     |            |
|                         | ACA (T) => ATA (I) | 3      |            |
|                         | CGG (R) => TGG (W) | 27     |            |
|                         | ACG (T) => ATG (M) | 2      |            |
|                         | ACC (T) => ATC (I) | 1      |            |
| hydrophilic-stop        | CAA (Q) => TAA (X) | 1      | 0.48%      |
|                         | CGA (R) => TGA (X) | 1      |            |

Table S4 Distribution of penta and hexa SSRs in the *A.shenzhenica* mitogenome.

| ID | SSR type | SSR       | Start  | End    | Location             |
|----|----------|-----------|--------|--------|----------------------|
| 1  | penta    | (TCCGA)3  | 20000  | 20014  | IGS(nad4L, nad5)     |
| 2  | penta    | (AAAAG)3  | 30671  | 30685  | IGS(nad4L, nad5)     |
| 3  | penta    | (TCTTA)3  | 126755 | 126769 | IGS(nad5, trnC-GCA)  |
| 4  | penta    | (TAAGG)3  | 191619 | 191633 | IGS(nad9, tRNA-Thr)  |
| 5  | hexa     | (CCCCGG)3 | 225860 | 225877 | IGS(trnF-GAA, rps7)  |
| 6  | penta    | (TAAAG)3  | 313314 | 313328 | IGS(PSA, rpl16)      |
| 7  | hexa     | (GGCTTG)3 | 324866 | 324883 | IGS(rpl2, rps11)     |
| 8  | penta    | (TACAA)3  | 353917 | 353931 | IGS(rps13, trnK-UUU) |
| 9  | penta    | (TCATT)3  | 444355 | 444369 | IGS(rps4, trnQ-UUG)  |
| 10 | penta    | (AAATG)3  | 543309 | 543323 | IGS(rn18, nad6)      |
| 11 | penta    | (TTTAG)3  | 579039 | 579053 | IGS(ccmB, nad7)      |
| 12 | penta    | (GAAAA)3  | 582124 | 582138 | IGS(ccmB, nad7)      |

Table S5 Distribution of perfect tandem repeats in *A.shenzhenica* mitogenome

| No | Repeat sequence                                                            | Size | Copy   | Percent | start-end      | Location            |
|----|----------------------------------------------------------------------------|------|--------|---------|----------------|---------------------|
|    |                                                                            |      | Number | Matches |                |                     |
| 1  | TATACATAGAAGCAA                                                            | 15   | 2.7    | 100     | 173401--173441 | IGS(nad9, tRNA-Thr) |
| 2  | ATATGTATTAG                                                                | 11   | 2.4    | 100     | 174049--174074 | IGS(nad9, tRNA-Thr) |
| 3  | ATAGATATAGAATAAGAATA<br>TATA                                               | 24   | 2      | 100     | 174101--174148 | IGS(nad9, tRNA-Thr) |
| 4  | GAGGAGAAAGGAGGAATGCT<br>CGACCGGAAGGGAACGAGTT<br>ACATACCTGGAACGAGTAGG<br>TT | 62   | 2.3    | 98      | 185579--185720 | IGS(nad9, tRNA-Thr) |
| 5  | ATTTGACTATTTCA                                                             | 14   | 1.9    | 100     | 203511--203537 | IGS(nad9, tRNA-Thr) |
| 6  | TGTTACATTTTGT                                                              | 13   | 1.9    | 100     | 204102--204126 | IGS(nad9, tRNA-Thr) |
| 7  | ATAGTATATATAAA                                                             | 14   | 2.1    | 100     | 268146--268174 | IGS(matR, tRNA-Cys) |
| 8  | TCTTTCTGTCAA                                                               | 12   | 2.1    | 100     | 305377--305401 | IGS(atp4, trnW-CCA) |
| 9  | AATAGTTTTAATTATTATGTTG<br>TTTC                                             | 26   | 2      | 100     | 418720--418771 | IGS(trnM-CAU, rps4) |
| 10 | ATAATAATATTATTATTTA                                                        | 20   | 2.2    | 100     | 431112--431154 | IGS(trnM-CAU, rps4) |
| 11 | TATAACTTTCTTATCCC                                                          | 17   | 2.3    | 95      | 558125--558164 | IGS(nad6, mttB)     |
| 12 | CTACTAAAGAAGG                                                              | 13   | 2.1    | 100     | 561059--561085 | IGS(nad6, mttB)     |
| 13 | TATATTGAATA                                                                | 11   | 2.3    | 100     | 603499--603523 | IGS(trnD-GUC, atp8) |

Table S6 The NCBI accession numbers of mitogenomes used in this study

| Famliy      | Organism                                | Accession    |
|-------------|-----------------------------------------|--------------|
| Asparagus   | <i>Allium cepa</i>                      | AP018390.1   |
|             | <i>Hemerocallis citrina</i>             | MZ726801-3   |
|             | <i>Gastrodia elata</i>                  | MF070084-102 |
|             | <i>Chlorophytum comosum</i>             | MW411187.1   |
|             | <i>Asparagus officinalis</i>            | MT483944.1   |
| Alismatales | <i>Zostera marina</i>                   | KX808392.1   |
|             | <i>Stratiotes aloides</i>               | KX808393.1   |
|             | <i>Spirodela polyrhiza</i>              | NC017840.1   |
|             | <i>Butomus umbellatus</i>               | KC208619.1   |
| Arecales    | <i>Phoenix dactylifera</i>              | MH176159.1   |
|             | <i>Cocos nucifera</i>                   | KX028885.1   |
|             | <i>Zea perennis</i>                     | DQ645538.1   |
|             | <i>Zea luxurians</i>                    | DQ645537.1   |
| Poales      | <i>Tripsacum dactyloides</i>            | NC008362.1   |
|             | <i>Zea mays</i>                         | DQ645536.1   |
|             | <i>Chrysopogon zizanioides</i>          | MN635785.1   |
|             | <i>Coix lacryma-jobi var. puellarum</i> | MT471098.1   |
|             | <i>Sorghum bicolor</i>                  | DQ984518.1   |
|             | <i>Sporobolus alterniflorus</i>         | MT471321.1   |
|             | <i>Eleusine indica</i>                  | MF616338.1   |
|             | <i>Oryza sativa</i>                     | JN861112.1   |
|             | <i>Oryza rufipogon</i>                  | AP011076.1   |
|             | <i>Oryza coarctata</i>                  | MG429050.1   |
|             | <i>Aegilops speltoides</i>              | AP013107.1   |
|             | <i>Triticum aestivum</i>                | GU985444.1   |
|             | <i>Hordeum vulgare</i>                  | MN127974.1   |
|             | <i>Lolium perenne</i>                   | JX999996.1   |
|             | <i>Bambusa oldhamii</i>                 | EU365401.1   |
| Outgroup    | <i>Medinilla magnifica</i>              | MT043351.1   |
|             | <i>Eucalyptus grandis</i>               | NC040010.1   |
|             | <i>Pyrus betulifolia</i>                | MW080658.1   |
|             | <i>Nelumbo nucifera</i>                 | NC030753.1   |
